# Supplementary material for: Preparation of supported Mo2C-based catalysts from organic–inorganic hybrid precursor for hydrogen production from methanol decomposition
Source: Royal Society of Chemistry journal article supplement (doi:10.1039/c0cc01430c), 2010-01-01
Supplement: c0cc01430c.pdf [file c0cc01430c.pdf]

## Electronic Supplementary Information (ESI)

# Preparation of Supported Mo<sub>2</sub>C-Based Catalysts from Organic-Inorganic Hybrid Precursor for Hydrogen Production from Methanol Decomposition

Qingsheng Gao, Chenxi Zhang, Sinong Wang, Wei Shen, Yahong Zhang, Hualong Xu,\* and Yi Tang\*

Department of Chemistry, Shanghai Key Laboratory of Molecular Catalysis and Innovative Materials and Laboratory of Advanced Materials, Fudan University, Shanghai 200433 (P. R. China).  
E-mail: yitang@fudan.edu.cn (Y. Tang), shuhl@fudan.edu.cn (H. L. Xu) Fax: (+86)21-6564-1740;  
Tel: (+86)21-5566-4125.

### Experimental section:

The precursor of Mo<sub>3</sub>O<sub>10</sub>(C<sub>6</sub>H<sub>8</sub>N)<sub>2</sub>·2H<sub>2</sub>O was prepared through the co-precipitation process. 2.48 g of ammonium heptamolybdate ((NH<sub>4</sub>)<sub>6</sub>Mo<sub>7</sub>O<sub>24</sub>·4H<sub>2</sub>O) was dissolved in 40 ml of distilled water, and 3.34 g of aniline was added in the above solution. Afterwards, 1 M HCl aqueous solution was dropwise added with magnetic stirring at room temperature until white precipitate appeared (pH 4~5). After a reaction with stirring at 50 °C in oil bath for 2~6 hours, the product was filtrated and washed with ethanol, and dried at 50 °C.

The synthesis of supported Mo<sub>2</sub>C catalysts was conducted as follow: 0.266 g of Mo<sub>3</sub>O<sub>10</sub>(C<sub>6</sub>H<sub>8</sub>N)<sub>2</sub>·2H<sub>2</sub>O was dispersed and dissolved in 40 mL H<sub>2</sub>O and 40 mL EtOH, followed by adding of 1.9 g of CNT. After stirring for 10 hours at room temperature, this mixture was dried at 50 °C. Finally, Mo<sub>2</sub>C/CNT catalysts can be obtained by calcining the above dried product at 725 °C for 5 hours under argon flow.

Co-Mo<sub>2</sub>C/CNT catalysts were prepared through the same impregnation procedure as Mo<sub>2</sub>C/CNT except that Co(NO<sub>3</sub>)<sub>2</sub>·2H<sub>2</sub>O is added with Mo<sub>3</sub>O<sub>10</sub>(C<sub>6</sub>H<sub>8</sub>N)<sub>2</sub>·2H<sub>2</sub>O in the starting impregnation solutions to different Mo/Co ratios. The sum of loaded Mo<sub>2</sub>C and

Co is fixed as 6.0%. After the same calcinations as those in Mo<sub>2</sub>C/CNT catalysts, a series of Co-Mo<sub>2</sub>C/CNT catalysts were obtained.

Physical measurement: XRD patterns were taken on a Bruker D8 diffractometer using Cu K $\alpha$  radiation ( $\lambda = 1.54056 \text{ \AA}$ ). TEM and SEM images were obtained on a JEOL JEM-2011 and a Philips XL 30 instrument. N<sub>2</sub> sorption isotherms were collected on a Micromeritics ASAP 2010 adsorption analyzer at -196 °C (77 K). BET specific surface area was calculated from adsorption data at a relative pressure range from 0.071 to 0.20. And X-ray fluorescence measurement on Bruker S4Explorer was used to measure Mo/Co ratio of each sample (after calibration using standard samples).

Catalytic activity of methanol decomposition was conducted at atmospheric pressure in a fixed-bed, continuous flow reactor consisting of a reaction tube (8 mm i.d.) with a thermocouple located in the catalyst bed. The amount of the catalyst used was 1.0 g. Methanol was injected into the reactor by a metering pump. The carrier gas was argon with a flow rate of 40 ml/min. The effluent composition was analyzed by an Agilent 6820 gas chromatograph equipped with a thermal conductivity detector (TCD) and a Porapak Q packed column. The performance of the catalysts was analyzed in terms of hydrogen production rate, methanol conversion and hydrogen selectivity in all H<sub>2</sub>-containing products.

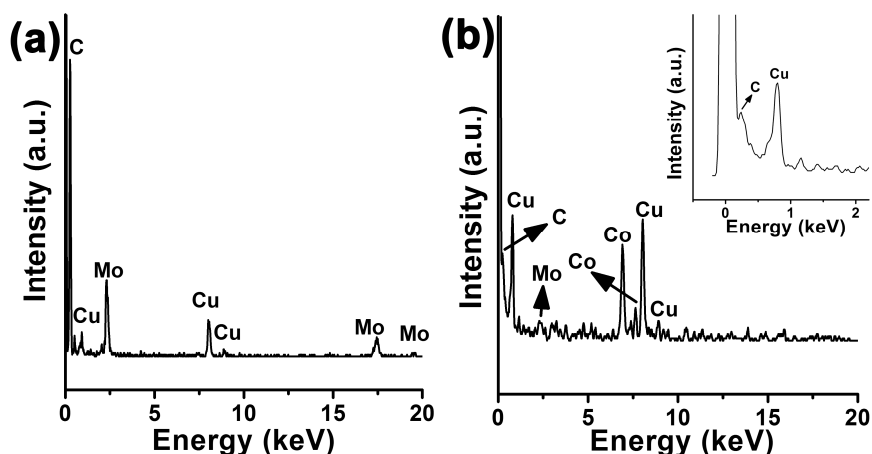

**Fig. S1** EDS of (a) Mo<sub>2</sub>C and (b) Co nanoparticles in Co-Mo<sub>2</sub>C/CNT catalyst. The inset of b is the magnification of EDS signal in the range of 0~2 keV.

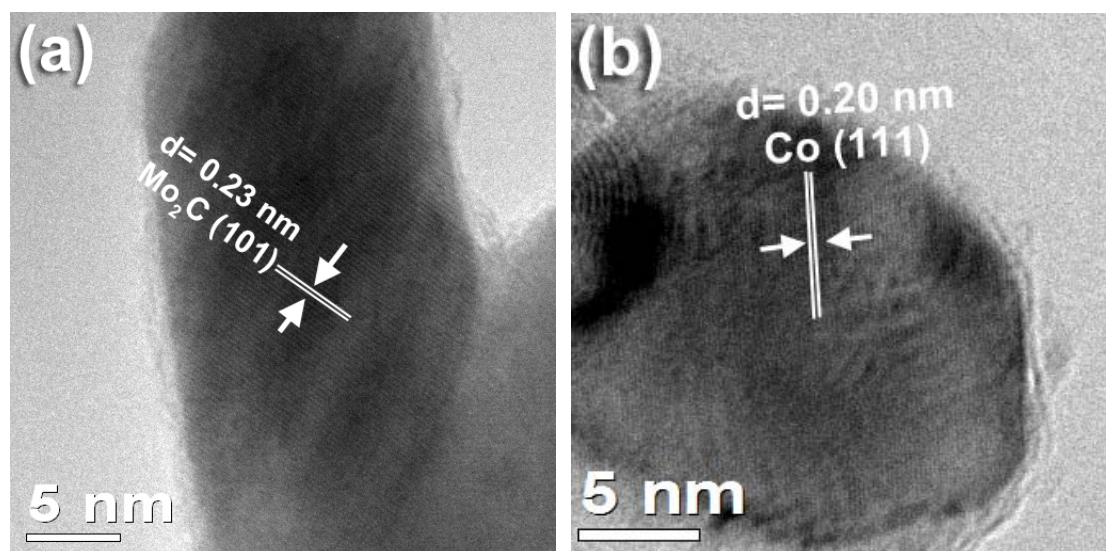

**Fig. S2** Magnified TEM images of (a) Mo<sub>2</sub>C and (b) Co nanoparticles in Co-Mo<sub>2</sub>C/CNT catalyst, which have been shown in manuscript as Fig. 1 d and e, respectively.

**Table S1** The BET surfaces of supported Mo<sub>2</sub>C-based catalysts

| Catalysts (loading amount: 6.0%)     | S <sub>BET</sub> (m <sup>2</sup> /g) |
|--------------------------------------|--------------------------------------|
| CNT blank                            | 181.8                                |
| Mo <sub>2</sub> C/CNT                | 156.5                                |
| Co-Mo <sub>2</sub> C/CNT (Mo/Co=3.0) | 148.8                                |
| Co-Mo <sub>2</sub> C/CNT (Mo/Co=2.0) | 159.7                                |
| Co-Mo <sub>2</sub> C/CNT (Mo/Co=1.0) | 152.2                                |
| Co-Mo <sub>2</sub> C/CNT (Mo/Co=0.5) | 150.5                                |
| Co-Mo <sub>2</sub> C/CNT (Mo/Co=0.3) | 149.7                                |

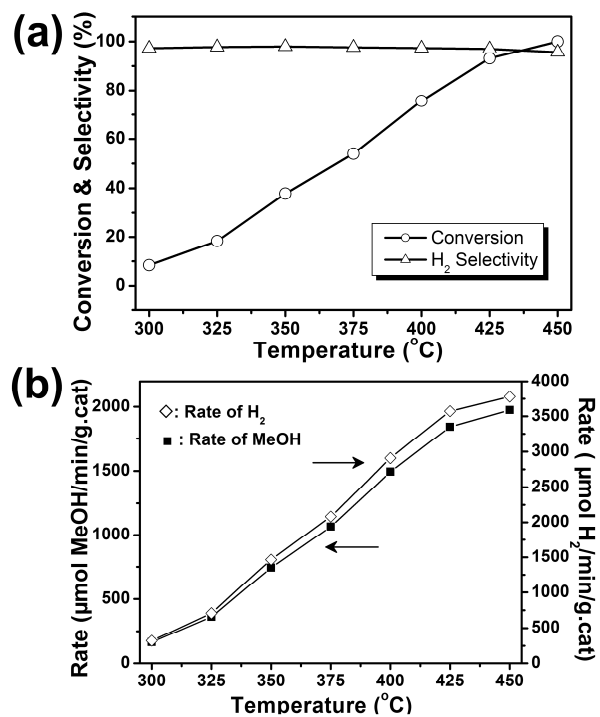

**Fig. S3** (a) Producing H<sub>2</sub> from methanol decomposition over 6.0 wt% Co-Mo<sub>2</sub>C/CNT (Mo/Co = 1.0) with increasing reaction temperature, and (b) the corresponding reaction rate and hydrogen production rate. Data were taken after 2 hours of reaction at given temperatures.

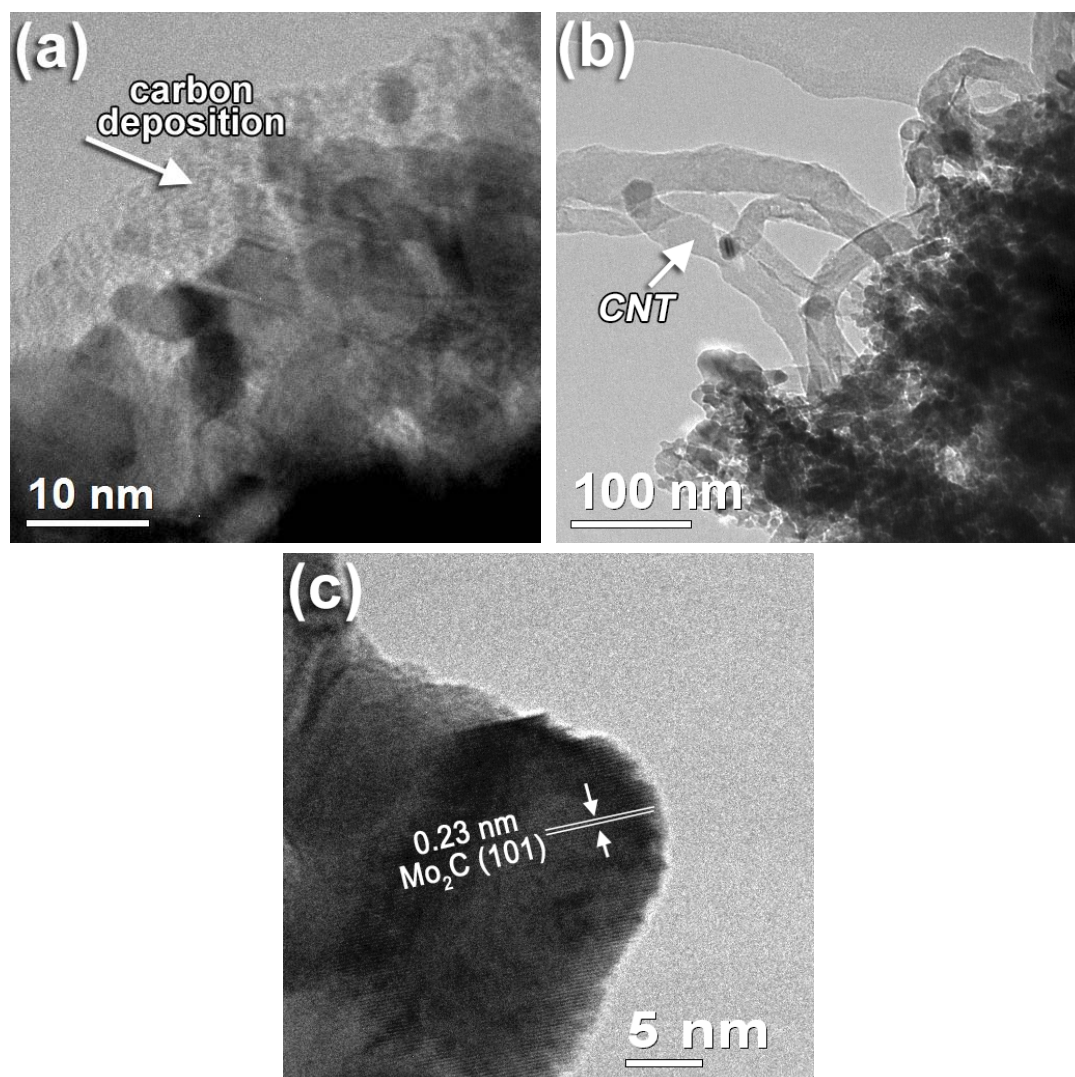

**Fig. S4** Magnified TEM images of the carbon deposition on the (a) Mo<sub>2</sub>C and (b) Co-Mo<sub>2</sub>C catalysts after treated under CH<sub>3</sub>OH/Ar at 450 °C in tubular reactor for 8 h. (c) is the HRTEM of Mo<sub>2</sub>C surface in Co-Mo<sub>2</sub>C after methanol treatment. These images have been shown in manuscript as Fig. 3.
